# Supplementary material for: Eubiotic gut microbiota mitigate colitis via colonic Treg expansion.
Source: Research Square preprint supplement (doi:10.21203/rs.3.rs-6225383/v1), 2025-04-22
Supplement: Supplementary file 1 [file 79a4f2dc856cf6a372961a65.pdf]

## Supplementary Figures

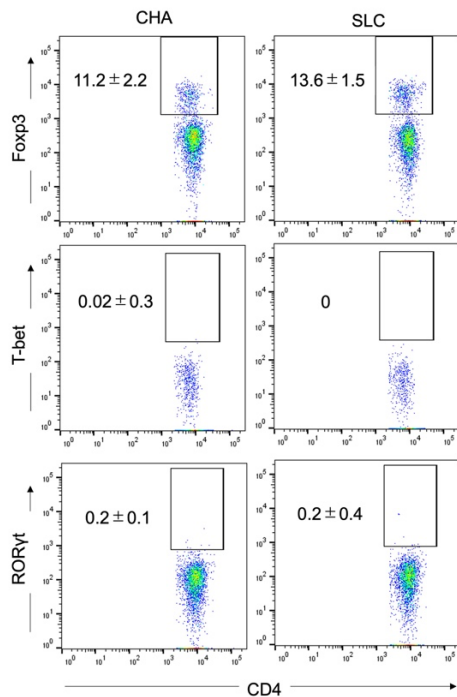

### Supplementary Figure 1.

Characterization of Th cells in SLC and Charles River (CHA) mice at day 0. Representative flow cytometry plots depicting pre-DSS colonic FOXP3<sup>+</sup>, T-bet<sup>+</sup>, and RORγt<sup>+</sup> cells gated on CD4<sup>+</sup> T cells (CD45<sup>+</sup>CD11b<sup>-</sup>CD3<sup>+</sup>).

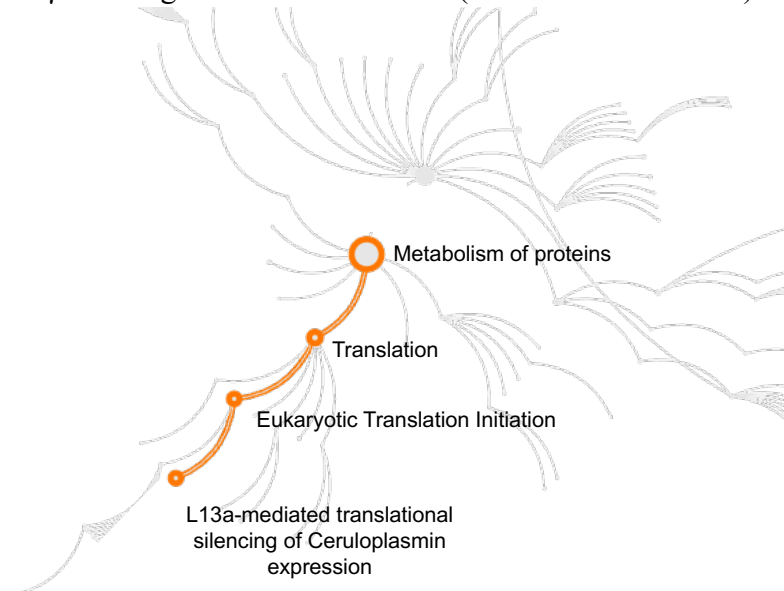

### Supplementary Figure 2.

Schematic overrepresentation pathway related Ceruloplasmin expression using reactome pathway analysis.

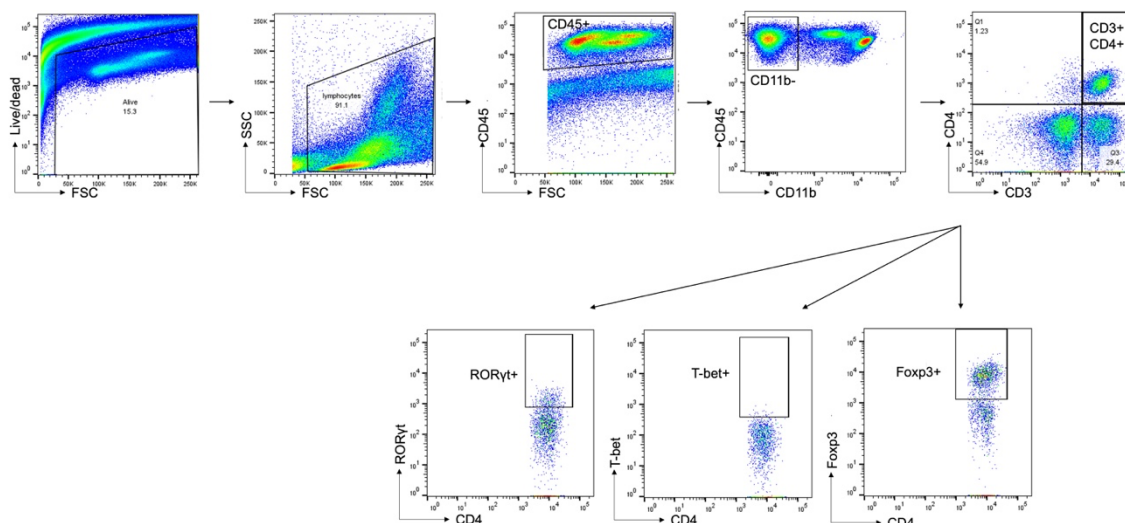

**Supplementary Figure 3. Flow cytometric gating strategy.**
